# Supplementary material
Source: publisher site journal article supplement (https://www.spandidos-publications.com/5461/downloadSupplementary)

Figure S1. Cell cycle distribution of MIA PaCa-2 treated with gemcitabine in the presence and absence of fucoxanthin.

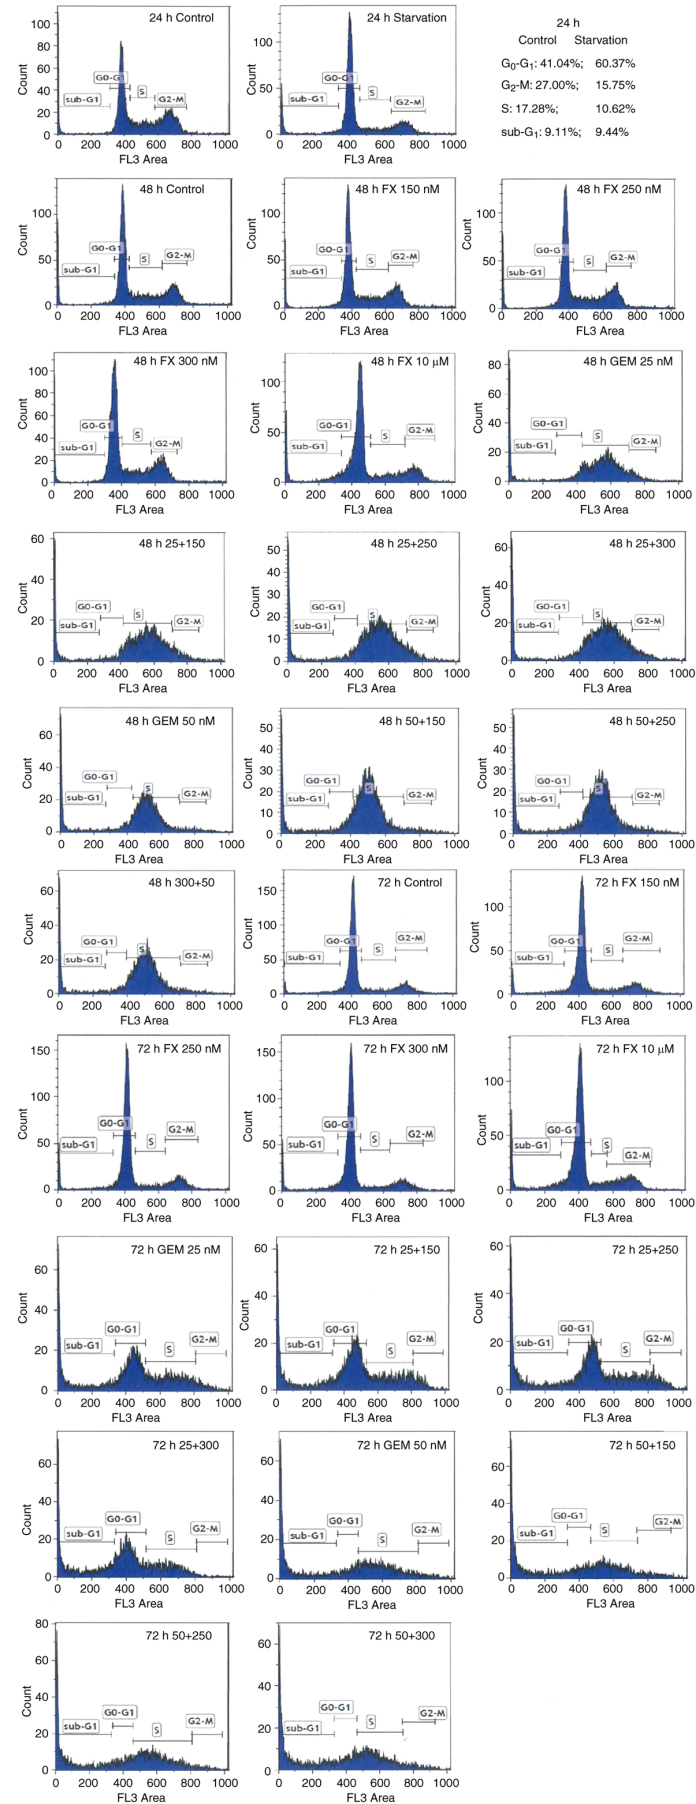

Figure S2. Cell cycle distribution of PANC-1 cells after treatment with gemcitabine in the presence and absence of fucoxanthin.

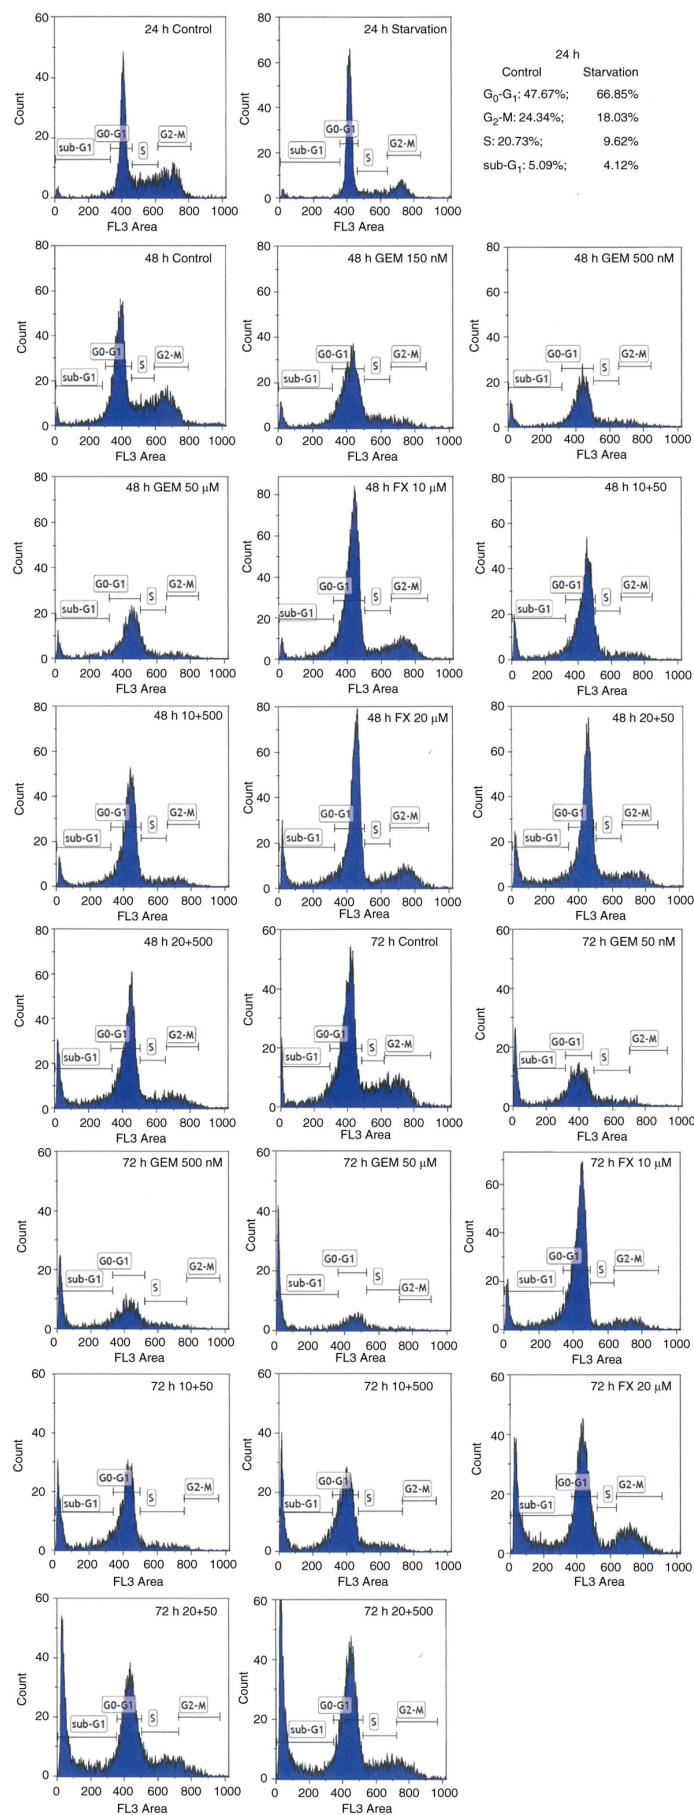

Figure S3. Cell cycle distribution of 293 cells after treatment with gemcitabine in the presence and absence of fucoxanthin.

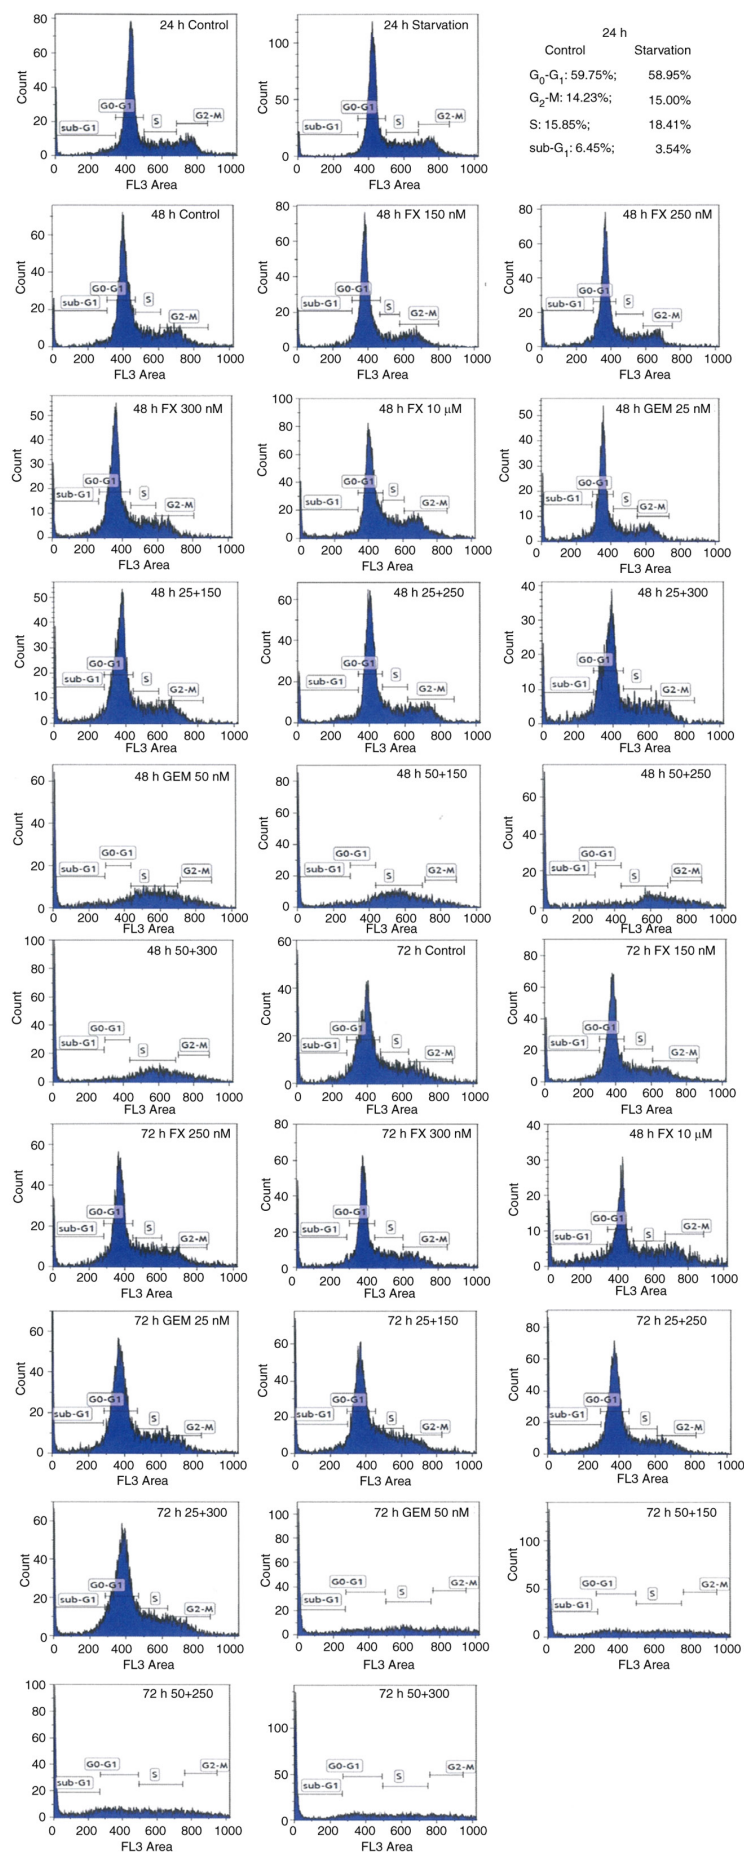

Supplement: Supplementary file 1 [file downloadSupplementary]
